# Supplementary material for: Interleukin-27 ameliorates allergic asthma by alleviating the lung Th2 inflammatory environment
Source: PubMed Central journal article supplement — Int J Mol Med. 2022 May 5;49(6):86. doi: 10.3892/ijmm.2022.5142 (PMC9106376; doi:10.3892/ijmm.2022.5142), 2022-05-05
Supplement: Supplementary_Data.pdf [file Supplementary_Data.pdf]

Table SI. Sequences of primers used for reverse transcription-quantitative PCR.

| Gene    | Sequence (5'→3')         | Product size (bp) |
|---------|--------------------------|-------------------|
| STAT1 F | CACCCTTGCTTACTCTACTGC    | 122               |
| STAT1 R | TTGAATGACTAAACGCCTGA     |                   |
| STAT3 F | ACCTCCAGGACGACTTTG       | 130               |
| STAT3 R | AGGGCTGTGAGCATCTGT       |                   |
| GAPDH F | AGAAACCTGCCAAGTATGATGACA | 131               |
| GAPDH R | GGAAGAGTGGGAGTTGCTGTTG   |                   |

F, forward; R, reverse; STAT, signal transducer and activator of transcription; GAPDH, glyceraldehyde-3-phosphate dehydrogenase; bp, base pair.
